# Supplementary material for: Self-healing of thermally-induced, biocompatible and biodegradable protein hydrogel
Source: Royal Society of Chemistry journal article supplement (doi:10.1039/c6ra11239k), 2016-01-01
Supplement: c6ra11239k1.pdf [file c6ra11239k1.pdf]

## Supplementary Materials

### Self-healing of Thermal-induced, Biocompatible and Biodegradable Protein Hydrogel

Jun Chen<sup>a</sup>, Xiaoyu Ma<sup>a</sup>, Qiuchen Dong<sup>a</sup>, Donghui Song<sup>b</sup>, Derek Hargrove<sup>b</sup>, Sahil R. Vora<sup>c</sup>, Anson W.K. Ma<sup>c,d</sup>, Xiuling Lu<sup>b</sup>, Yu Lei<sup>a,c\*</sup>

<sup>a</sup>Department of Biomedical Engineering, University of Connecticut, Storrs, CT 06269, USA

<sup>b</sup> Department of Pharmaceutical Sciences, University of Connecticut, Storrs, CT 06269, USA

<sup>c</sup>Department of Chemical and Biomolecular Engineering, University of Connecticut, Storrs, CT 06269, USA

<sup>d</sup>Polymer Program, Institute of Materials Science, University of Connecticut, Storrs, CT 06269, USA

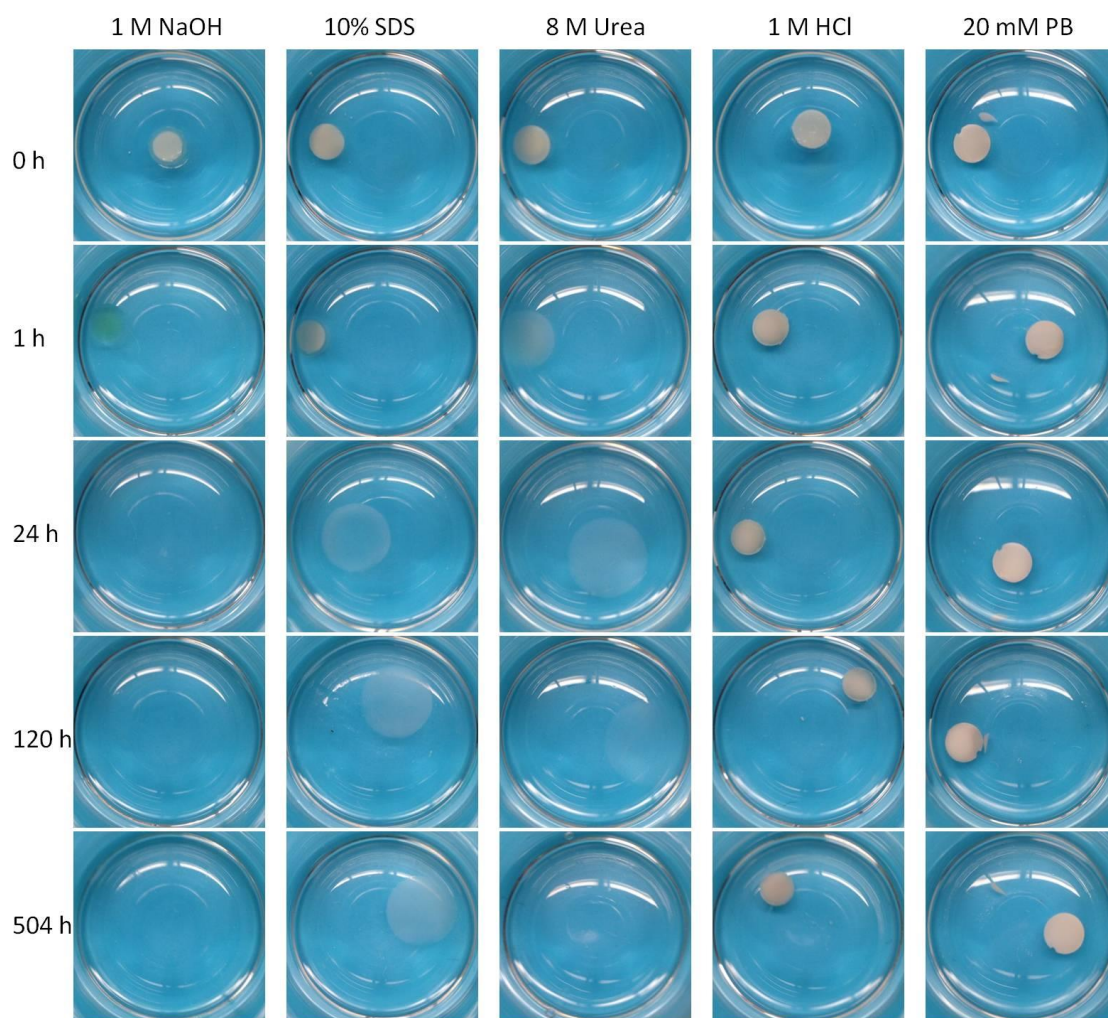

Figure S1. BSA hydrogels in various chemical environments and time. Small cylindrical BSA hydrogel disk with a diameter as 5 mm and a thickness as 2 mm was immersed into 1 M NaOH, 10% SDS, 8 M urea, 1M HCl, and 20 mM PB, respectively.

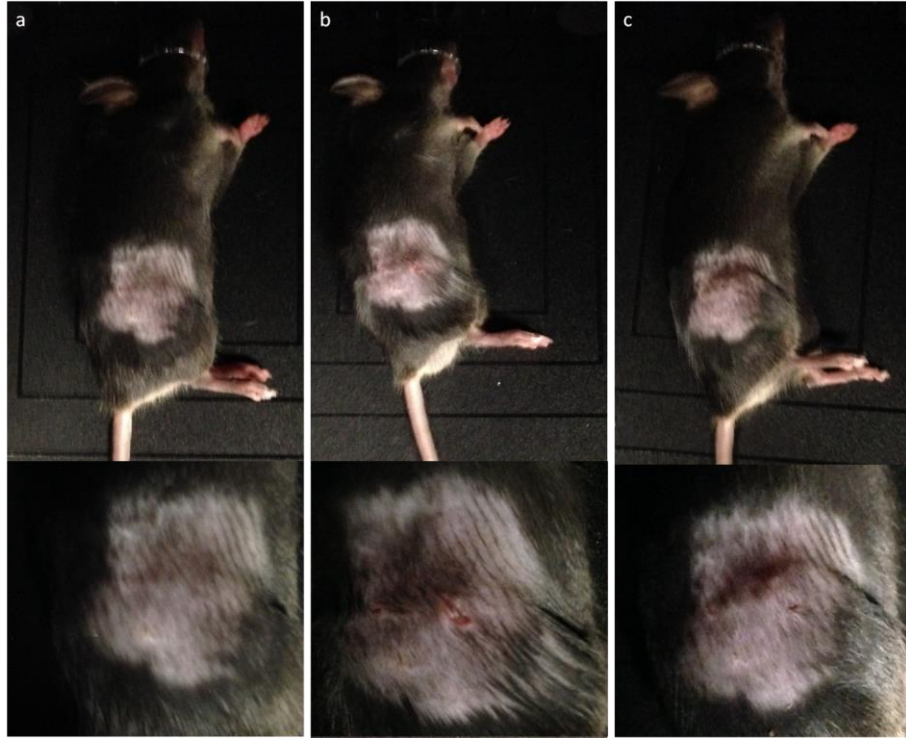

Figure S2. The histomorphometry and inflammatory responses before (a) and immediately after (b) injection, as well as 1-day after injection (c).
